# Supplementary material for: Evaluation of noble metals as reactive electrodes for separation of lanthanides from molten LiF-BeF2
Source: Royal Society of Chemistry journal article supplement (doi:10.1039/d3gc01440a), 2023-01-01
Supplement: d3gc01440a1.pdf [file d3gc01440a1.pdf]

## Supporting Information

### S1. Standard formation potential of Ln-M intermetallics from trivalent Ln(III)

For Ni-richest Gd<sub>2</sub>Ni<sub>17</sub> from Gd(III), equation 1 and 2 applied

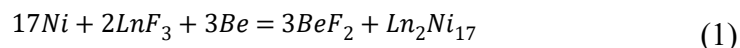

$$\Delta G_{Ln_2Ni_{17}} + 3\Delta G_{BeF_2} - 2\Delta G_{LnF_3} = -6F\Delta E_{Ln_2Ni_{17}} \quad (2)$$

$$(-18.3 \times 19 - 3 \times 891.9 + 2 \times 1480.1) \times 1000 = -6 \times 96485 \Delta E_{Gd_2Ni_{17}}$$

$$\Delta E_{Gd_2Ni_{17}} = 0.109V \text{ vs. } E^0_{Be(II)/Be}$$

For Ni-richest Nd<sub>2</sub>Ni<sub>17</sub> from Nd(III), equation 1 and 2 applied

$$(-16.9 \times 19 - 3 \times 891.9 + 2 \times 1464.3) \times 1000 = -6 \times 96485 \Delta E_{Nd_2Ni_{17}}$$

$$\Delta E_{Nd_2Ni_{17}} = 0.118V \text{ vs. } E^0_{Be(II)/Be}$$

For Ni-richest PrNi<sub>5</sub> from Pr(III), equation 3 and 4 applied

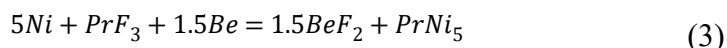

$$\Delta G_{PrNi_5} + 1.5\Delta G_{BeF_2} - \Delta G_{PrF_3} = -3F\Delta E_{PrNi_5} \quad (4)$$

$$(-16.4 \times 6 - 1.5 \times 891.9 + 1472.7) \times 1000 = -3 \times 96485 \Delta E_{PrNi_5}$$

$$\Delta E_{PrNi_5} = -0.126V \text{ vs. } E^0_{Be(II)/Be}$$

For not Ni-richest NdNi<sub>5</sub> from Nd(III), equation 5 and 6 applied

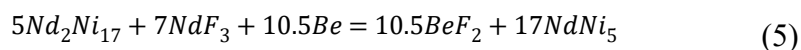

$$17\Delta G_{NdNi_5} + 10.5\Delta G_{BeF_2} - 7\Delta G_{NdF_3} - 5\Delta G_{Nd_2Ni_{17}} = -21F\Delta E_{NdNi_5} \quad (6)$$

$$(-28.1 \times 17 \times 6 - 10.5 \times 891.9 + 7 \times 1464.3 + 5 \times 16.9 \times 19) \times 1000 = -21 \times 96485 \Delta E_{NdNi_5}$$

$$\Delta E_{NdNi_5} = 0.185V \text{ vs. } E^0_{Be(II)/Be}$$

For Cu-richest PrCu<sub>6</sub> from Pr(III), equation 7 and 8 applied

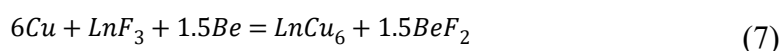

$$\Delta G_{LnCu_6} + 1.5\Delta G_{BeF_2} - \Delta G_{LnF_3} = -3F\Delta E_{LnCu_6} \quad (8)$$

$$(-27.4 \times 7 - 1.5 \times 891.9 + 1472.7) \times 1000 = -3 \times 96485 \Delta E_{PrCu_6}$$

$$\Delta E_{PrCu_6} = 0.197V \text{ vs. } E^0_{Be(II)/Be}$$

For Cu-richest NdCu<sub>6</sub> from Pr(III), equation 7 and 8 applied

$$(-27.6 \times 7 - 1.5 \times 891.9 + 1464.3) \times 1000 = -3 \times 96485 \Delta E_{\text{NdCu}_6}$$

$$\Delta E_{\text{NdCu}_6} = 0.231 \text{ V vs. } E^0_{\text{Be(II)/Be}}$$

For Al-richest  $\text{Nd}_3\text{Al}_{11}$  from Nd(III), equation 9 and 10 applied

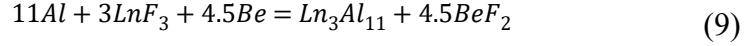

$$\Delta G_{\text{Ln}_3\text{Al}_{11}} + 4.5\Delta G_{\text{BeF}_2} - 3\Delta G_{\text{LnF}_3} = -9F\Delta E_{\text{Ln}_3\text{Al}_{11}} \quad (10)$$

$$(-41.3 \times 14 - 4.5 \times 891.9 + 3 \times 1464.3) \times 1000 = -9 \times 96485 \Delta E_{\text{Nd}_3\text{Al}_{11}}$$

$$\Delta E_{\text{Nd}_3\text{Al}_{11}} = 0.229 \text{ V vs. } E^0_{\text{Be(II)/Be}}$$

For Al-richest  $\text{Pr}_3\text{Al}_{11}$  from Pr(III), equation 9 and 10 applied

$$(-33.3 \times 14 - 4.5 \times 891.9 + 3 \times 1472.7) \times 1000 = -9 \times 96485 \Delta E_{\text{Pr}_3\text{Al}_{11}}$$

$$\Delta E_{\text{Pr}_3\text{Al}_{11}} = 0.071 \text{ V vs. } E^0_{\text{Be(II)/Be}}$$

For Ag-richest  $\text{Nd}_{14}\text{Ag}_{51}$  from Nd(III), equation 11 and 12 applied

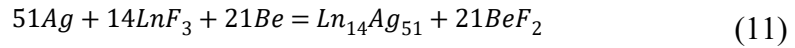

$$\Delta G_{\text{Ln}_{14}\text{Ag}_{51}} + 21\Delta G_{\text{BeF}_2} - 14\Delta G_{\text{LnF}_3} = -42F\Delta E_{\text{Ln}_{14}\text{Ag}_{51}} \quad (12)$$

$$(-32.4 \times 65 - 21 \times 891.9 + 14 \times 1464.3) \times 1000 = -42 \times 96485 \Delta E_{\text{Nd}_{14}\text{Ag}_{51}}$$

$$\Delta E_{\text{Nd}_{14}\text{Ag}_{51}} = 0.083 \text{ V vs. } E^0_{\text{Be(II)/Be}}$$

For Ag-richest  $\text{Gd}_{14}\text{Ag}_{51}$  from Gd(III), equation 11 and 12 applied

$$(-32.3 \times 65 - 21 \times 891.9 + 14 \times 1480.4) \times 1000 = -42 \times 96485 \Delta E_{\text{Gd}_{14}\text{Ag}_{51}}$$

$$\Delta E_{\text{Gd}_{14}\text{Ag}_{51}} = 0.026 \text{ V vs. } E^0_{\text{Be(II)/Be}}$$

For Ag-richest  $\text{PrAg}_5$  from Pr(III), equation 13 and 14 applied

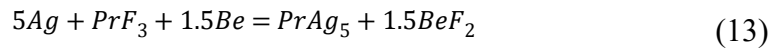

$$\Delta G_{\text{PrAg}_5} + 1.5\Delta G_{\text{BeF}_2} - \Delta G_{\text{PrF}_3} = -3F\Delta E_{\text{PrAg}_5} \quad (14)$$

$$(-16.2 \times 6 - 1.5 \times 891.9 + 1472.7) \times 1000 = -3 \times 96485 \Delta E_{\text{PrAg}_5}$$

$$\Delta E_{\text{PrAg}_5} = -0.130 \text{ V vs. } E^0_{\text{Be(II)/Be}}$$

For not Ag-richest  $\text{Pr}_{14}\text{Ag}_{51}$  from Pr(III), equation 15 and 16 applied

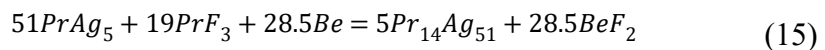

$$5\Delta G_{\text{Pr}_{14}\text{Ag}_{51}} + 28.5\Delta G_{\text{BeF}_2} - 19\Delta G_{\text{PrF}_3} - 51\Delta G_{\text{PrAg}_5} = -57F\Delta E_{\text{Pr}_{14}\text{Ag}_{51}} \quad (16)$$

$$(-5 \times 19.4 \times 65 - 28.5 \times 891.9 + 19 \times 1472.7 + 51 \times 16.2 \times 6) \times 1000 = -$$

$$57 \times 96485 \Delta E_{\text{Pr}_{14}\text{Ag}_{51}}$$

$$\Delta E_{\text{Pr}_{14}\text{Ag}_{51}} = -0.221 \text{ V vs. } E^0_{\text{Be(II)/Be}}$$

For Au-richest  $\text{PrAu}_6$  from Pr(III), equation 17 and 18 applied

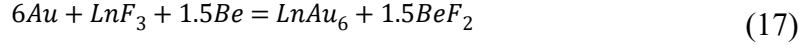

$$\Delta G_{\text{LnAu}_6} + 1.5\Delta G_{\text{BeF}_2} - \Delta G_{\text{LnF}_3} = -3F\Delta E_{\text{LnAu}_6} \quad (18)$$

$$(-36.6 \times 7 - 1.5 \times 891.9 + 1472.7) \times 1000 = -3 \times 96485 \Delta E_{\text{PrAu}_6}$$

$$\Delta E_{\text{PrAu}_6} = 0.419 \text{ V vs. } E^0_{\text{Be(II)/Be}}$$

For Au-richest  $\text{NdAu}_6$  from Nd(III), equation 17 and 18 applied

$$(-41.7 \times 7 - 1.5 \times 891.9 + 1464.3) \times 1000 = -3 \times 96485 \Delta E_{\text{NdAu}_6}$$

$$\Delta E_{\text{NdAu}_6} = 0.572 \text{ V vs. } E^0_{\text{Be(II)/Be}}$$

For not Au-richest  $\text{Pr}_{14}\text{Au}_{51}$  from Pr(III), equation 19 and 20 applied

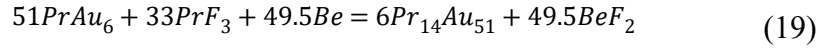

$$6\Delta G_{\text{Pr}_{14}\text{Au}_{51}} + 49.5\Delta G_{\text{BeF}_2} - 33\Delta G_{\text{PrF}_3} - 51\Delta G_{\text{PrAu}_6} = -99F\Delta E_{\text{Pr}_{14}\text{Au}_{51}} \quad (20)$$

$$(-6 \times 48.5 \times 65 - 49.5 \times 891.9 + 33 \times 1472.7 + 51 \times 36.6 \times 7) \times 1000 = -$$

$$99 \times 96485 \Delta E_{\text{Pr}_{14}\text{Au}_{51}}$$

$$\Delta E_{\text{Pr}_{14}\text{Au}_{51}} = 0.146 \text{ V vs. } E^0_{\text{Be(II)/Be}}$$

For Pt-richest  $\text{NdPt}_5$  from Nd(III), equation 21 and 22 applied

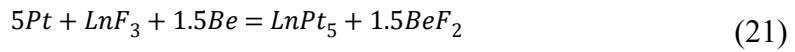

$$\Delta G_{\text{LnPt}_5} + 1.5\Delta G_{\text{BeF}_2} - \Delta G_{\text{LnF}_3} = -3F\Delta E_{\text{LnPt}_5} \quad (22)$$

$$(-61.8 \times 6 - 1.5 \times 891.9 + 1464.3) \times 1000 = -3 \times 96485 \Delta E_{\text{NdPt}_5}$$

$$\Delta E_{\text{NdPt}_5} = 0.844 \text{ V vs. } E^0_{\text{Be(II)/Be}}$$

## S2. Standard formation potential of Ln-M intermetallics from divalent Ln(II)

For Ni-richest  $\text{Eu}_2\text{Ni}_{17}$  from Eu(II), equation 23 and 24 applied

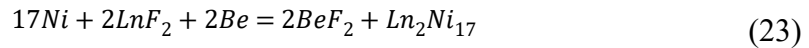

$$\Delta G_{\text{Ln}_2\text{Ni}_{17}} + 2\Delta G_{\text{BeF}_2} - 2\Delta G_{\text{LnF}_2} = -4F\Delta E_{\text{Ln}_2\text{Ni}_{17}} \quad (24)$$

$$(-13.3 \times 19 - 2 \times 891.9 + 2 \times 1046.1) \times 1000 = -4 \times 96485 \Delta E_{\text{Eu}_2\text{Ni}_{17}}$$

$$\Delta E_{\text{Eu}_2\text{Ni}_{17}} = -0.144 \text{ V vs. } E^0_{\text{Be(II)/Be}}$$

For Ni-richest  $\text{Sm}_2\text{Ni}_{17}$  from  $\text{Sm(II)}$ , equation 7 and 8 applied

$$(-18.5 \times 19 - 2 \times 891.9 + 2 \times 1004.4) \times 1000 = -4 \times 96485 \Delta E_{\text{Sm}_2\text{Ni}_{17}}$$

$$\Delta E_{\text{Sm}_2\text{Ni}_{17}} = 0.328 \text{ V vs. } E^0_{\text{Be(II)/Be}}$$

For not Ni-richest  $\text{EuNi}_5$  from  $\text{Eu(II)}$ , equation 25 and 26 applied

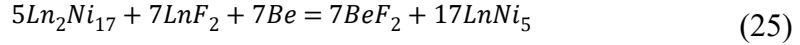

$$17\Delta G_{\text{LnNi}_5} + 7\Delta G_{\text{BeF}_2} - 5\Delta G_{\text{Ln}_2\text{Ni}_{17}} - 7\Delta G_{\text{LnF}_2} = -14F\Delta E_{\text{LnNi}_5} \quad (26)$$

$$(-17 \times 6 \times 15.5 - 7 \times 891.9 + 5 \times 19 \times 13.3 + 7 \times 1046.1) \times 1000 = -14 \times 96485 \Delta E_{\text{EuNi}_5}$$

$$\Delta E_{\text{EuNi}_5} = -0.564 \text{ V vs. } E^0_{\text{Be(II)/Be}}$$

For Cu-richest  $\text{SmCu}_6$  from  $\text{Sm(II)}$ , equation 27 and 28 applied

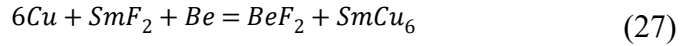

$$\Delta G_{\text{SmCu}_6} + \Delta G_{\text{BeF}_2} - \Delta G_{\text{SmF}_2} = -2F\Delta E_{\text{SmCu}_6} \quad (28)$$

$$(-19.0 \times 7 - 891.9 + 1004.4) \times 1000 = -2 \times 96485 \Delta E_{\text{SmCu}_6}$$

$$\Delta E_{\text{SmCu}_6} = 0.106 \text{ V vs. } E^0_{\text{Be(II)/Be}}$$

For Cu-richest  $\text{EuCu}_5$  from  $\text{Eu(II)}$ , equation 29 and 30 applied

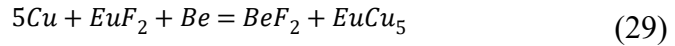

$$\Delta G_{\text{EuCu}_5} + \Delta G_{\text{BeF}_2} - \Delta G_{\text{EuF}_2} = -2F\Delta E_{\text{EuCu}_5} \quad (30)$$

$$(-22.8 \times 6 - 891.9 + 1046.1) \times 1000 = -2 \times 96485 \Delta E_{\text{EuCu}_5}$$

$$\Delta E_{\text{EuCu}_5} = -0.090 \text{ V vs. } E^0_{\text{Be(II)/Be}}$$

For not Cu-richest  $\text{EuCu}_2$  from  $\text{Eu(II)}$ , equation 31 and 32 applied

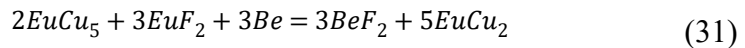

$$5\Delta G_{\text{EuCu}_2} + 3\Delta G_{\text{BeF}_2} - 3\Delta G_{\text{EuF}_2} - 2\Delta G_{\text{EuCu}_5} = -6F\Delta E_{\text{EuCu}_2} \quad (32)$$

$$(-5 \times 35.8 \times 3 - 3 \times 891.9 + 3 \times 1046.1 + 2 \times 22.8 \times 6) \times 1000 = -6 \times 96485 \Delta E_{\text{EuCu}_2}$$

$$\Delta E_{\text{EuCu}_2} = -0.344 \text{ V vs. } E^0_{\text{Be(II)/Be}}$$

For Al-richest  $\text{EuAl}_4$  from  $\text{Eu(II)}$ , equation 33 and 34 applied

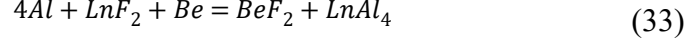

$$\Delta G_{LnAl_4} + \Delta G_{BeF_2} - \Delta G_{EuF_2} = -2F\Delta E_{LnAl_4} \quad (34)$$

$$(-24.6 \times 5 - 891.9 + 1046.1) \times 1000 = -2 \times 96485 \Delta E_{EuAl4}$$

$$\Delta E_{EuAl4} = -0.162V \text{ vs. } E^0_{Be(II)/Be}$$

For Al-richest SmAl<sub>4</sub> from Sm(II) , equation 33 and 34 applied

$$(-38.3 \times 5 - 891.9 + 1004.4) \times 1000 = -2 \times 96485 \Delta E_{SmAl4}$$

$$\Delta E_{SmAl4} = 0.409V \text{ vs. } E^0_{Be(II)/Be}$$

For Ag-richest EuAg<sub>5</sub> from Eu(II) , equation 35 and 36 applied

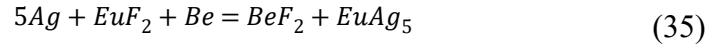

$$\Delta G_{EuAg_5} + \Delta G_{BeF_2} - \Delta G_{EuF_2} = -2F\Delta E_{EuAg_5} \quad (36)$$

$$(-23.8 \times 6 - 891.9 + 1046.1) \times 1000 = -2 \times 96485 \Delta E_{EuAg5}$$

$$\Delta E_{EuAg5} = -0.059V \text{ vs. } E^0_{Be(II)/Be}$$

For Au-richest EuAu<sub>5</sub> from Eu(II) , equation 37 and 38 applied

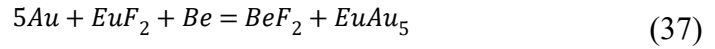

$$\Delta G_{EuAu_5} + \Delta G_{BeF_2} - \Delta G_{EuF_2} = -2F\Delta E_{EuAu_5} \quad (38)$$

$$(-43.5 \times 6 - 891.9 + 1046.1) \times 1000 = -2 \times 96485 \Delta E_{EuAu5}$$

$$\Delta E_{EuAu5} = 0.553V \text{ vs. } E^0_{Be(II)/Be}$$

For Au-richest SmAu<sub>6</sub> from Sm(II) , equation 39 and 40 applied

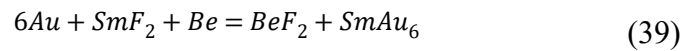

$$\Delta G_{SmAu_6} + \Delta G_{BeF_2} - \Delta G_{SmF_2} = -2F\Delta E_{SmAu_6} \quad (40)$$

$$(-43.3 \times 7 - 891.9 + 1004.4) \times 1000 = -2 \times 96485 \Delta E_{SmAu6}$$

$$\Delta E_{SmAu6} = 0.988V \text{ vs. } E^0_{Be(II)/Be}$$

For Pt-richest EuPt<sub>5</sub> from Eu(II) , equation 41 and 42 applied

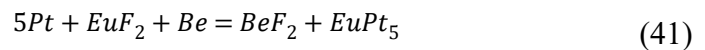

$$\Delta G_{EuPt_5} + \Delta G_{BeF_2} - \Delta G_{EuF_2} = -2F\Delta E_{EuPt_5} \quad (42)$$

$$(-39.3 \times 6 - 891.9 + 1046.1) \times 1000 = -2 \times 96485 \Delta E_{EuPt5}$$

$$\Delta E_{\text{EuPt5}} = 0.423\text{V vs. } E^0_{\text{Be(II)/Be}}$$

### S3. Phase diagram of Be-M (M=W, Cu, Ni, Al, Ag, Au, Pt) binary system

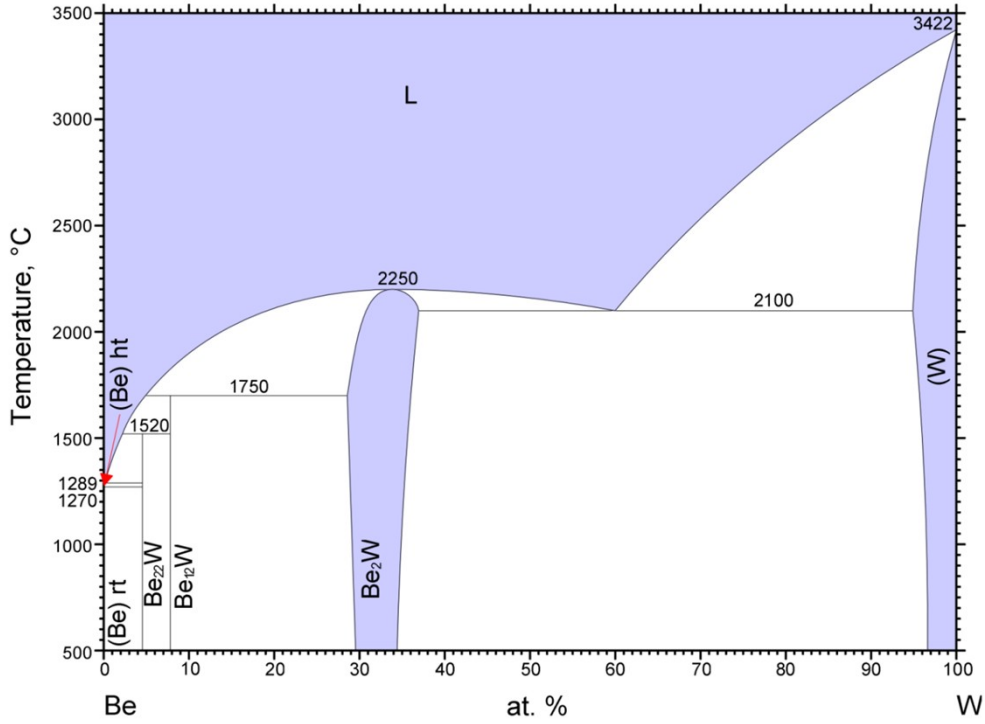

Fig. 1s. Be-W binary phase diagram [1].

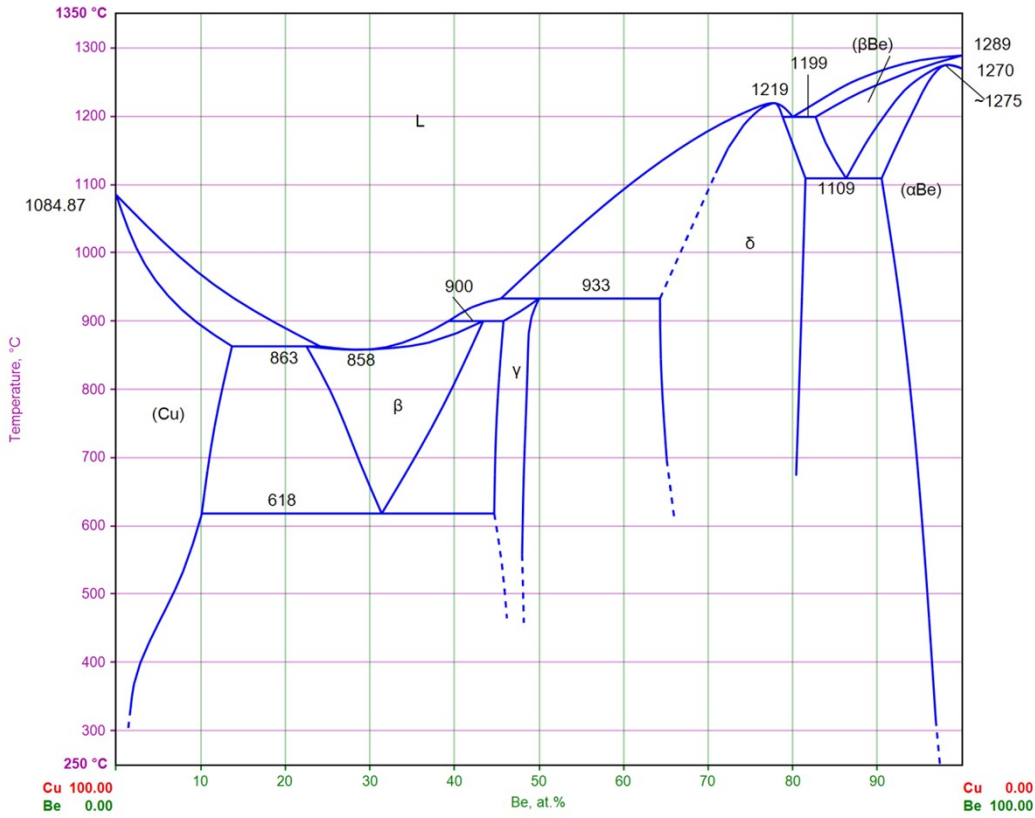

Fig. 2s. Be-Cu binary phase diagram [2].

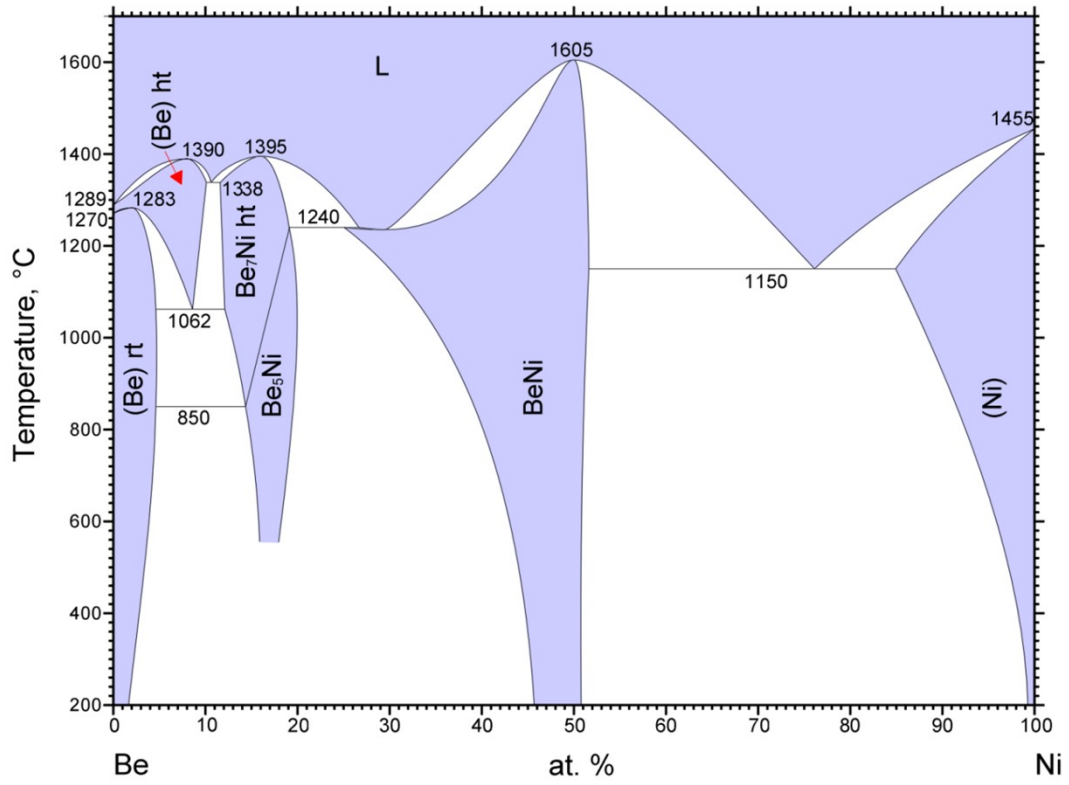

Fig. 3s. Be-Ni binary phase diagram [3].

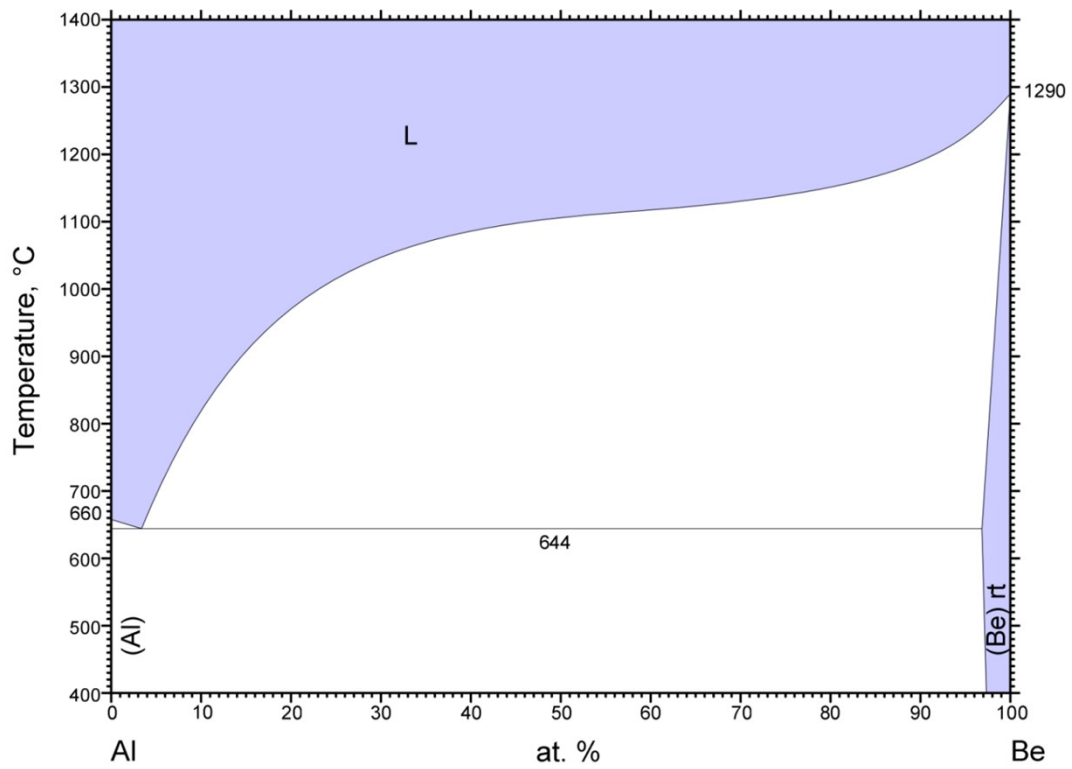

Fig. 4s. Be-Al binary phase diagram [4].

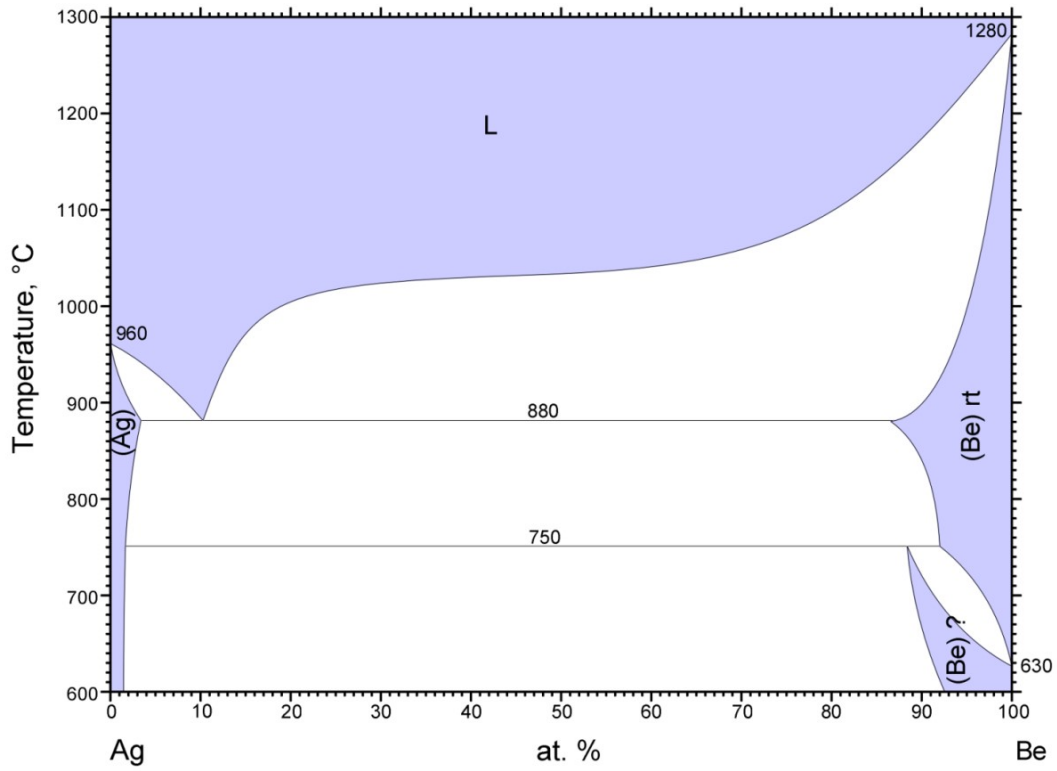

Fig. 5s. Be-Ag binary phase diagram [5].

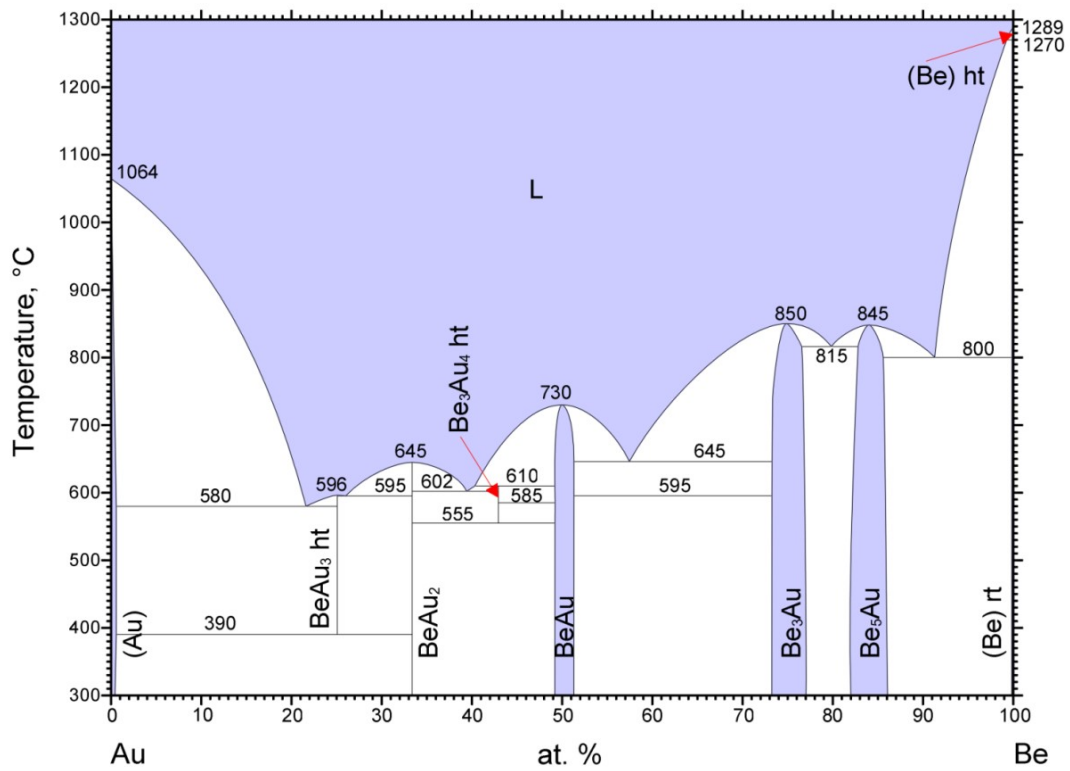

Fig. 6s. Be-Au binary phase diagram [6].



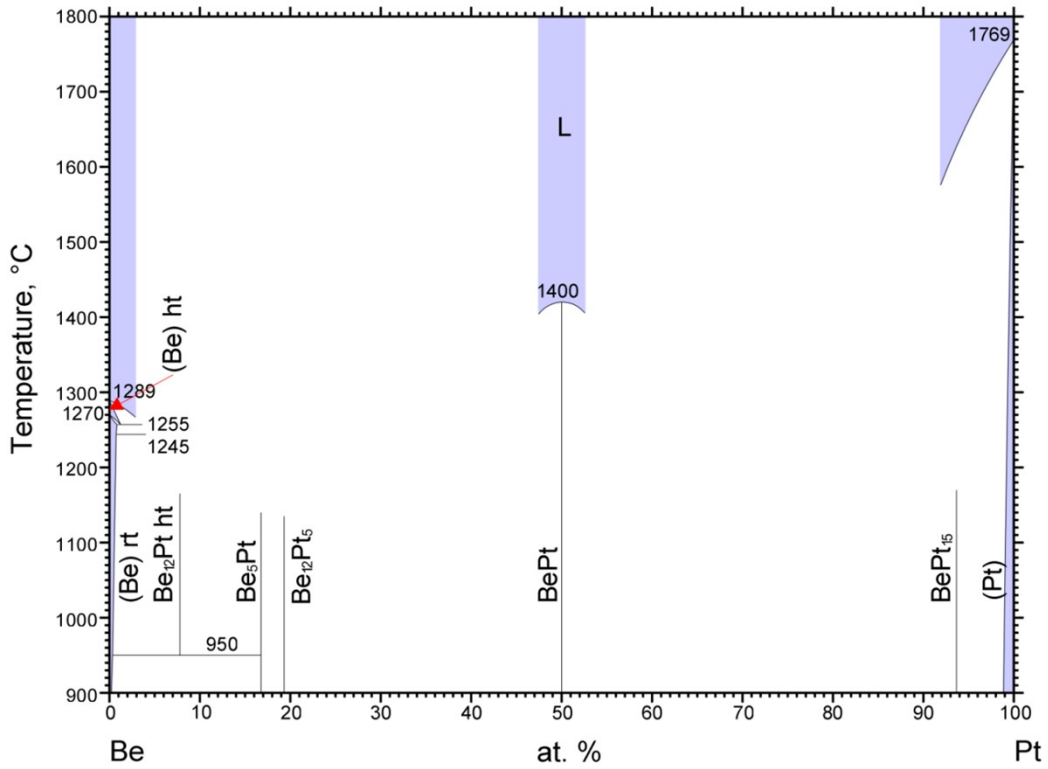

Fig. 7s. Be-Pt binary phase diagram [7].

**S4. Phase diagram of Ln-W (Ln=Nd, Sm, Eu) binary system**

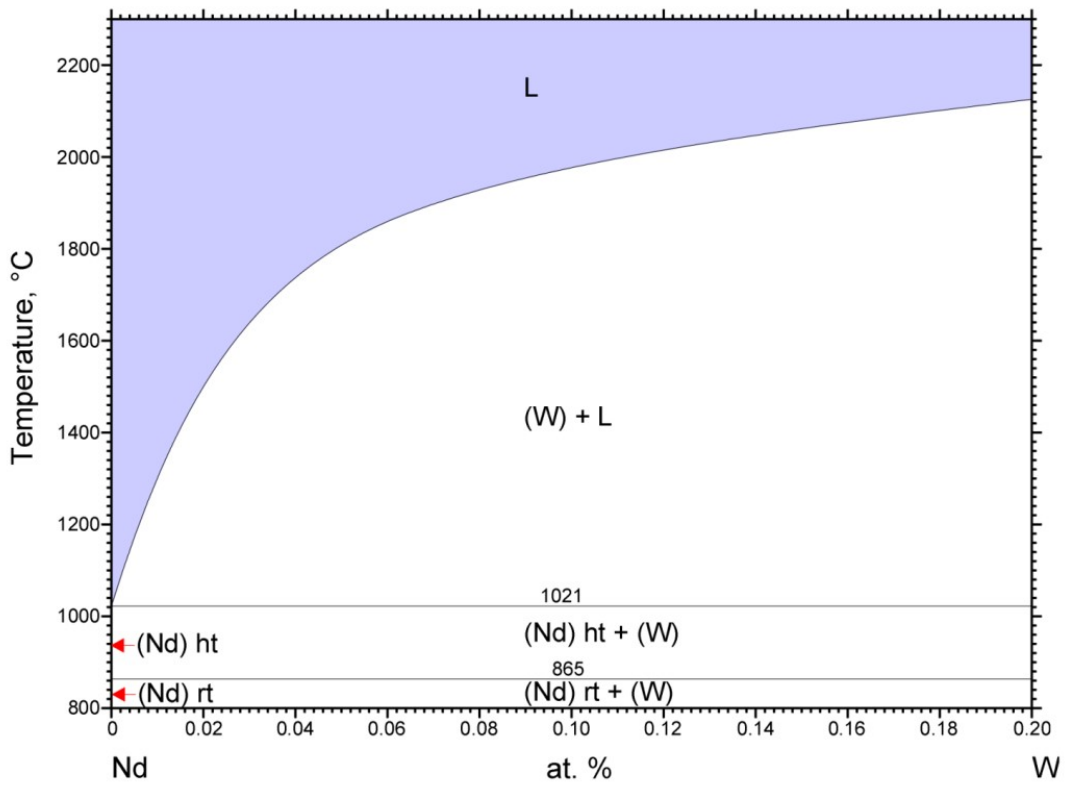

Fig. 8s. Nd-W binary phase diagram [8].

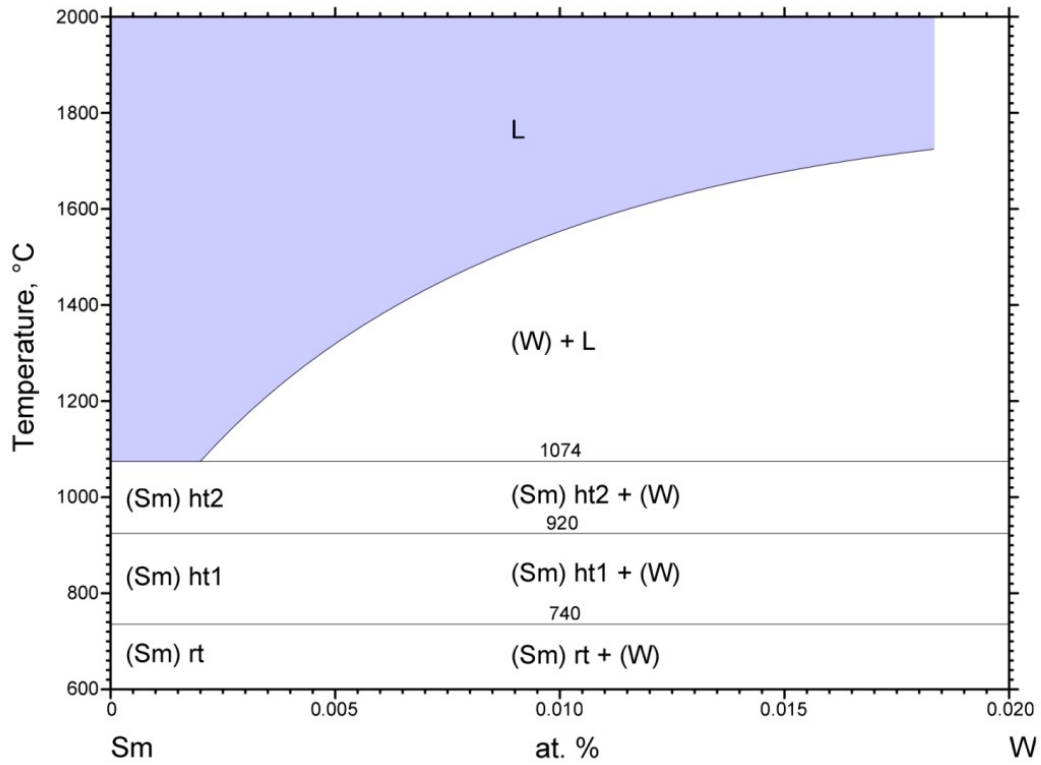

Fig. 9s. Sm-W binary phase diagram [9].

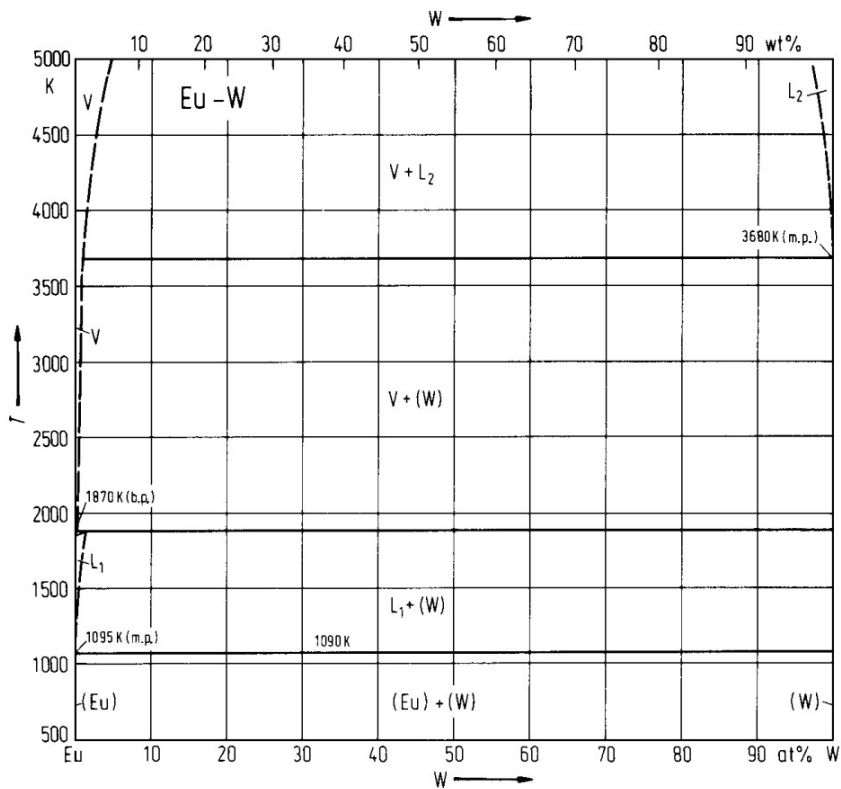

Fig. 10s Eu-W calculated phase diagram [10]

S5. XRD pattern of FLiBe-LnF<sub>3</sub> salts (Ln=Nd, Sm, Eu)

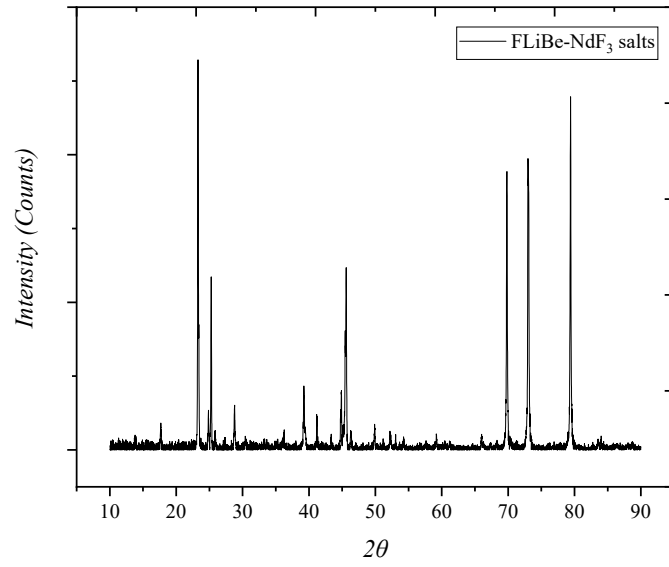

**Fig.11s** XRD pattern of FLiBe-2.0wt%NdF<sub>3</sub> salts

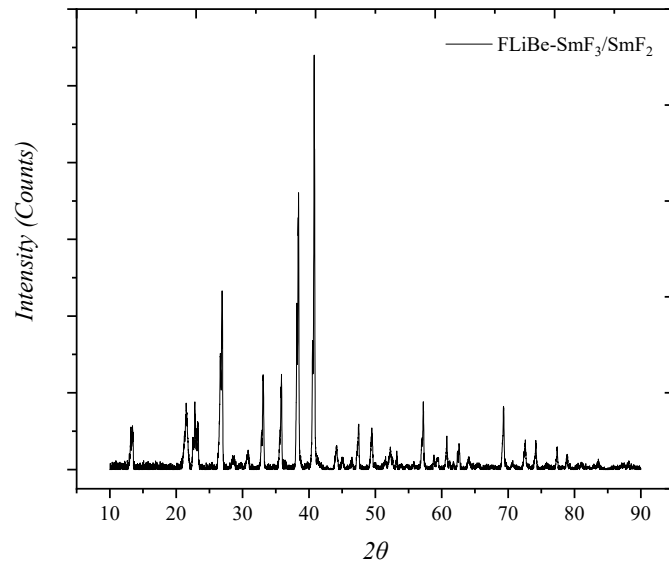

**Fig.12s** XRD pattern of FLiBe-2.0wt%SmF<sub>3</sub> salts

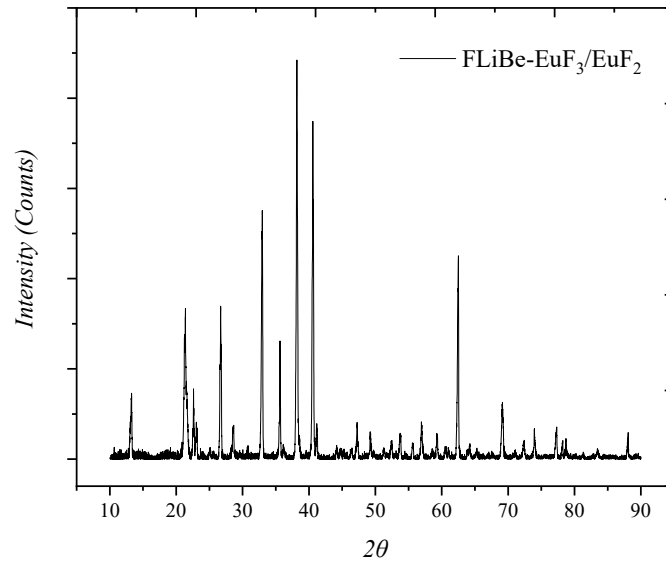

**Fig.13s** XRD pattern of FLiBe-1.34wt%EuF<sub>3</sub> salts

## References

- [1] Pierre Villars (Chief Editor), PAULING FILE in: Inorganic Solid Phases, Springer Materials (online database), Springer, Heidelberg (ed.) Be-W Binary Phase Diagram 0-100 at.% W [https://materials.springer.com/isp/phase-diagram/docs/c\\_0900419](https://materials.springer.com/isp/phase-diagram/docs/c_0900419) c\_0900419 (Springer-Verlag GmbH, Heidelberg, © 2016)
- [2] Andy Watson and MSIT (2003) Effenberg, G. (Ed.) MSI Eureka in Springer Materials The assessed phase diagram of the Be-Cu binary system [https://materials.springer.com/msi/phase-diagram/docs/sm\\_msi\\_r\\_20\\_016028\\_01\\_full\\_LnkDia0](https://materials.springer.com/msi/phase-diagram/docs/sm_msi_r_20_016028_01_full_LnkDia0) 20.16028.1.1 (MSI Materials Science International Services GmbH, Stuttgart © 2003)
- [3] Pierre Villars (Chief Editor), PAULING FILE in: Inorganic Solid Phases, Springer Materials (online database), Springer, Heidelberg (ed.) Be-Ni Binary Phase Diagram 0-100 at.% Ni [https://materials.springer.com/isp/phase-diagram/docs/c\\_0900403](https://materials.springer.com/isp/phase-diagram/docs/c_0900403) c\_0900403 (Springer-Verlag GmbH, Heidelberg, © 2016)
- [4] Pierre Villars (Chief Editor), PAULING FILE in: Inorganic Solid Phases, Springer Materials (online database), Springer, Heidelberg (ed.) Al-Be Binary Phase Diagram 0-100 at.% Be [https://materials.springer.com/isp/phase-diagram/docs/c\\_0903906](https://materials.springer.com/isp/phase-diagram/docs/c_0903906) c\_0903906 (Springer-Verlag GmbH, Heidelberg, © 2016)
- [5] Pierre Villars (Chief Editor), PAULING FILE in: Inorganic Solid Phases, SpringerMaterials (online database), Springer, Heidelberg (ed.) Ag-Be Binary Phase Diagram 0-100 at.% Be [https://materials.springer.com/isp/phase-diagram/docs/c\\_0906737](https://materials.springer.com/isp/phase-diagram/docs/c_0906737) c\_0906737 (Springer-Verlag GmbH, Heidelberg, © 2016)

- [6] Pierre Villars (Chief Editor), PAULING FILE in: Inorganic Solid Phases, SpringerMaterials (online database), Springer, Heidelberg (ed.) Au-Be Binary Phase Diagram 0-100 at.% Be c\_0900198 (Springer-Verlag GmbH, Heidelberg, © 2016)
- [7] Pierre Villars (Chief Editor), PAULING FILE in: Inorganic Solid Phases, SpringerMaterials (online database), Springer, Heidelberg (ed.) Be-Pt Binary Phase Diagram 0-100 at.% Pt c\_0900406 (Springer-Verlag GmbH, Heidelberg, © 2016)
- [8] Pierre Villars (Chief Editor), PAULING FILE in: Inorganic Solid Phases, SpringerMaterials (online database), Springer, Heidelberg (ed.) Nd-W Binary Phase Diagram 0-0.2 at.% W c\_0907852 (Springer-Verlag GmbH, Heidelberg, © 2016)
- [9] Pierre Villars (Chief Editor), PAULING FILE in: Inorganic Solid Phases, SpringerMaterials (online database), Springer, Heidelberg (ed.) Sm-W Binary Phase Diagram 0-0.02 at.% W c\_0907853 (Springer-Verlag GmbH, Heidelberg, © 2016)
- [10] B. Predel O. Madelung (ed.) Eu-W (Europium-Tungsten) Landolt-Börnstein - Group IV Physical Chemistry 5E (Dy-Er – Fr-Mo) [https://materials.springer.com/lb/docs/sm\\_lbs\\_978-3-540-48786-9\\_1284](https://materials.springer.com/lb/docs/sm_lbs_978-3-540-48786-9_1284) 10.1007/10474837\_1284 (Springer-Verlag Berlin Heidelberg © 1995)
